# Supplementary material
Source: Research Square preprint supplement (doi:10.21203/rs.3.rs-9686781/v1)
Supplement: Supplementary file 1 [file eab8a79b829d172f829abf1f.docx]

**Stratified cumulative antibiograms and antimicrobial resistance trends among hospitalized patients in a Chinese tertiary hospital: a 7-year retrospective study**

**Supplementary Methods**

**S1. Specimen-stratified analyses**

Major specimen categories were harmonized into mutually exclusive respiratory, blood, urine, wound/pus, and sterile body fluid groups for supplementary stratified analyses. Generic labels that could not be assigned without cross-classification were excluded from mutually exclusive grouping to avoid overlap across specimen categories. Supplementary Tables S1-S2 and Supplementary Figure S1 summarize the resulting pathogen spectrum and key resistance patterns across these specimen strata.

**S2. Deduplication robustness analyses**

The primary manuscript used a patient-organism-year first-isolate rule aligned with cumulative susceptibility reporting guidance. Supplementary deduplication analyses compared this rule with alternative inpatient first-isolate definitions to assess whether the main pathogen structure and key resistance contrasts were materially altered under more permissive or less time-constrained approaches. The corresponding comparisons are summarized in Supplementary Table S3.

**S3. Hospital-based SARS-CoV-2 high-activity period sensitivity analyses**

Hospital-based SARS-CoV-2 high-activity periods were defined using prespecified monthly thresholds of positivity rate >=20% and positive counts >=500. Contiguous months of elevated activity were grouped into the same phase if separated by no more than 2 months. These definitions and phase coverage are provided in Supplementary Table S4 and Supplementary Figure S2. The resulting exclusion-based sensitivity analyses are summarized in Supplementary Table S5 and in Figure 4 of the main manuscript.

**S4. Temporal trend-screening framework**

Temporal trend analyses were performed on the first-isolate AST panel dataset. The screened trend-testing set was restricted to organism-antibiotic combinations involving seven predefined focus organisms. Combinations entered trend testing only if they met the prespecified annual minimum sample-size threshold (n >= 10) and contributed data in at least three calendar years. This yielded 161 screened organism-antibiotic combinations, of which 39 showed nominal temporal significance and 10 remained significant after false-discovery-rate correction. Supplementary Table S6 contains the complete statistical results for this screened set.

**Supplementary Results Summary**

1. Specimen stratification

The specimen-stratified analyses support the main-text statement that additional heterogeneity exists beyond the adult ICU versus non-ICU comparison. Supplementary Table S1 shows clear differences in pathogen spectrum across respiratory, urine, blood, wound/pus, and sterile body fluid specimens. Respiratory specimens were enriched for *Acinetobacter baumannii*, *Klebsiella pneumoniae*, and *Pseudomonas aeruginosa,* whereas urine specimens were dominated by *Escherichia coli*, *Enterococcus faecium*, and *Enterococcus faecalis*. Supplementary Table S2 shows that key resistance phenotypes also varied across specimen groups. These findings strengthen the interpretation that resistance ecology differs across clinical contexts, but they are best treated as secondary support rather than as a separate principal storyline in the manuscript.

2. Deduplication robustness

Alternative deduplication rules did not materially change the main inpatient pathogen structure when the comparison remained within the hospitalized cohort. Under the primary patient-organism-year first-isolate rule, *E. coli* accounted for 12.97% of isolates; under the inpatient patient-organism first-isolate rule, the corresponding proportion was 12.66%. The adult ICU-minus-non-ICU gap for meropenem-resistant *A. baumannii* also remained large under both rules (28.83 versus 29.51 pp). By contrast, the more permissive inpatient sample-organism first rule substantially inflated the analytical sample size (80,061 versus 45,645 isolates) and shifted key resistance metrics. These comparisons support retention of the patient-organism-year first-isolate rule as the primary manuscript definition.

3. COVID high-activity exclusion

Excluding hospital-based SARS-CoV-2 high-activity periods produced only minimal changes in the main pathogen spectrum and key resistance results. Across the top 10 pathogens, the largest absolute change was 0.19 pp. Across the prespecified key resistance phenotypes, the largest absolute change was 0.69 pp. The adult ICU versus non-ICU gaps for CRAB meropenem, CRPA imipenem, MRSA, and CRKP imipenem all persisted after exclusion. These findings support the interpretation that the principal heterogeneity pattern identified in the manuscript reflects a stable institutional feature rather than a pandemic-specific perturbation.

4. Temporal trend statistics

Supplementary Table S6 provides the full statistical basis for Results 3.3. Among the five prespecified resistance phenotypes highlighted in the manuscript, three showed nominal significance before multiple-testing correction and two remained significant after false-discovery-rate adjustment. The prespecified FDR-positive combinations were CRAB measured by meropenem and CRKP measured by imipenem. Overall, the complete trend table supports the interpretation that temporal change was selective rather than absent: statistically supported declines were observed for some carbapenem-resistance markers, whereas MRSA, CRPA measured by imipenem, and levofloxacin-resistant *E. coli* did not show robust temporal trends. Supplementary Table S6 includes all organism-antibiotic combinations entering the prespecified trend-screen set (n=161), including the five resistance phenotypes highlighted in Figure 3 and Table 3 of the main manuscript.

5. Overall interpretation of the supplementary analyses

Taken together, these supplementary analyses support the main manuscript in four ways: they document additional heterogeneity across specimen strata, support the primary first-isolate definition, show minimal perturbation of the main findings after exclusion of SARS-CoV-2 high-activity periods, and provide complete statistical support for the interpretation of selective temporal change.

**Supplementary Tables**

Supplementary Table S1. Pathogen spectrum stratified by major specimen type

Top five organisms are shown for each mutually exclusive major specimen group.

Isolates with non-specific specimen labels were not forced into a major specimen group.

| **Specimen group** | **Total isolates** | **Rank** | **Organism** | **Isolates** | **Proportion (%)** |
| --- | --- | --- | --- | --- | --- |
| Respiratory | 17,733 | 1 | *Acinetobacter baumannii* | 2,931 | 16.53 |
| 2 | *Klebsiella pneumoniae* | 2,589 | 14.60 |
| 3 | *Pseudomonas aeruginosa* | 2,444 | 13.78 |
| 4 | *Candida albicans* | 2,090 | 11.79 |
| 5 | *Staphylococcus aureus* | 1,045 | 5.89 |
| Urine | 10,720 | 1 | *Escherichia coli* | 2,899 | 27.04 |
| 2 | *Enterococcus faecium* | 1,147 | 10.70 |
| 3 | *Enterococcus faecalis* | 879 | 8.20 |
| 4 | *Candida albicans* | 771 | 7.19 |
| 5 | *Klebsiella pneumoniae* | 771 | 7.19 |
| Blood | 4,110 | 1 | *Escherichia coli* | 669 | 16.28 |
| 2 | *Staphylococcus epidermidis* | 555 | 13.50 |
| 3 | *Klebsiella pneumoniae* | 411 | 10.00 |
| 4 | *Staphylococcus aureus* | 305 | 7.42 |
| 5 | *Staphylococcus hominis* | 265 | 6.45 |
| Wound/Pus | 4,668 | 1 | *Escherichia coli* | 958 | 20.52 |
| 2 | *Staphylococcus aureus* | 716 | 15.34 |
| 3 | *Klebsiella pneumoniae* | 380 | 8.14 |
| 4 | *Staphylococcus epidermidis* | 282 | 6.04 |
| 5 | *Pseudomonas aeruginosa* | 273 | 5.85 |
| Sterile body fluid | 3,298 | 1 | *Escherichia coli* | 531 | 16.10 |
| 2 | *Klebsiella pneumoniae* | 317 | 9.61 |
| 3 | *Enterococcus faecium* | 308 | 9.34 |
| 4 | *Staphylococcus epidermidis* | 192 | 5.82 |
| 5 | *Enterococcus faecalis* | 185 | 5.61 |

This table summarizes the major pathogen composition across respiratory, urine, blood, wound/pus, and sterile body fluid specimens. It supports the statement in the main text that additional heterogeneity exists across specimen-defined clinical contexts.

**Supplementary Table S2. Key organism-antibiotic resistance rates stratified by major specimen type**

Only prespecified key resistance phenotypes were included.

Resistance rate is the percentage of tested isolates interpreted as resistant.

| **Specimen group** | **Phenotype** | **Organism** | **Antibiotic** | **n tested** | **Resistance rate (%)** |
| --- | --- | --- | --- | --- | --- |
| Respiratory | MRSA | *Staphylococcus aureus* | Oxacillin | 1,043 | 59.25 |
| CRAB | *Acinetobacter baumannii* | Meropenem | 2,535 | 79.96 |
| CRPA | *Pseudomonas aeruginosa* | Imipenem | 2,317 | 28.74 |
| CRKP | *Klebsiella pneumoniae* | Imipenem | 2,437 | 19.86 |
| FQ-R E. coli | *Escherichia coli* | Levofloxacin | 543 | 55.43 |
| Urine | MRSA | *Staphylococcus aureus* | Oxacillin | 136 | 50.00 |
| CRAB | *Acinetobacter baumannii* | Meropenem | 120 | 67.50 |
| CRPA | *Pseudomonas aeruginosa* | Imipenem | 333 | 15.02 |
| CRKP | *Klebsiella pneumoniae* | Imipenem | 725 | 33.66 |
| FQ-R E. coli | *Escherichia coli* | Levofloxacin | 2,884 | 63.59 |
| Blood | MRSA | *Staphylococcus aureus* | Oxacillin | 305 | 43.28 |
| CRAB | *Acinetobacter baumannii* | Meropenem | 84 | 78.57 |
| CRPA | *Pseudomonas aeruginosa* | Imipenem | 135 | 16.30 |
| CRKP | *Klebsiella pneumoniae* | Imipenem | 381 | 23.36 |
| FQ-R E. coli | *Escherichia coli* | Levofloxacin | 663 | 50.23 |
| Wound/Pus | MRSA | *Staphylococcus aureus* | Oxacillin | 715 | 43.64 |
| CRAB | *Acinetobacter baumannii* | Meropenem | 72 | 79.17 |
| CRPA | *Pseudomonas aeruginosa* | Imipenem | 258 | 9.30 |
| CRKP | *Klebsiella pneumoniae* | Imipenem | 366 | 11.75 |
| FQ-R E. coli | *Escherichia coli* | Levofloxacin | 955 | 42.93 |
| Sterile body fluid | MRSA | *Staphylococcus aureus* | Oxacillin | 172 | 48.84 |
| CRAB | *Acinetobacter baumannii* | Meropenem | 114 | 86.84 |
| CRPA | *Pseudomonas aeruginosa* | Imipenem | 118 | 31.36 |
| CRKP | *Klebsiella pneumoniae* | Imipenem | 296 | 29.73 |
| FQ-R E. coli | *Escherichia coli* | Levofloxacin | 527 | 57.12 |

This table summarizes selected resistance phenotypes and organism-antibiotic combinations across major specimen groups. It provides secondary support for specimen-based heterogeneity beyond the main adult ICU versus non-ICU analysis.

**Supplementary Table S3. Comparison of main results under alternative deduplication rules**

The primary analysis used the inpatient patient-organism-year first-isolate rule.

Alternative rules were evaluated to assess methodological robustness.

| **Metric** | **Primary analysis** | **Alternative rule 1** | **Alternative rule 2** |
| --- | --- | --- | --- |
| Sample size | 45645.0 | 43952.0 | 80061.0 |
| E. coli proportion (%) | 12.97 | 12.66 | 12.07 |
| K. pneumoniae proportion (%) | 10.48 | 10.49 | 12.93 |
| A. baumannii proportion (%) | 8.0 | 8.01 | 12.24 |
| P. aeruginosa proportion (%) | 7.79 | 7.39 | 9.96 |
| C. albicans proportion (%) | 7.73 | 7.71 | 7.07 |
| MRSA overall resistance (%) | 49.02 | 48.66 | 51.27 |
| CRAB meropenem resistance (%) | 79.42 | 79.18 | 89.5 |
| CRPA imipenem resistance (%) | 24.74 | 23.82 | 33.82 |
| CRKP imipenem resistance (%) | 22.93 | 22.35 | 35.94 |
| FQ-R E. coli levofloxacin resistance (%) | 56.38 | 55.28 | 57.85 |
| ICU-nonICU gap for CRAB meropenem (pp) | 28.83 | 29.51 | 17.94 |
| ICU-nonICU gap for CRPA imipenem (pp) | 15.06 | 14.71 | 9.33 |
| ICU-nonICU gap for MRSA oxacillin (pp) | 9.91 | 10.22 | 12.34 |
| ICU-nonICU gap for CRKP imipenem (pp) | 17.51 | 17.48 | 19.31 |

This table compares the primary patient-organism-year first-isolate rule with alternative inpatient deduplication approaches and demonstrates that the primary rule preserves the main pathogen structure while avoiding inflation of the analytical sample.

**Supplementary Table S4. Definition and coverage of hospital-based SARS-CoV-2 high-activity periods**

High-activity periods were based on institutional SARS-CoV-2 testing activity.

Candidate high-activity months were identified using positivity rate >=20% and/or >=500 positive tests and then grouped into retained high-activity phases.

| **High-activity period** | **Start month** | **End month** | **No. of months** | **Included months** | **Isolates** | **Samples** | **Patients** | **ICU isolates (%)** | **Respiratory specimens (%)** |
| --- | --- | --- | --- | --- | --- | --- | --- | --- | --- |
| Wave 1 high-activity period | 2022-12 | 2023-01 | 2 | 2022-12, 2023-01 | 1,221 | 1,200 | 754 | 44.10 | 48.20 |
| Wave 2 high-activity period | 2023-05 | 2023-08 | 4 | 2023-05, 2023-06, 2023-07, 2023-08 | 2,520 | 2,427 | 1,713 | 22.20 | 40.10 |
| Wave 3 high-activity period | 2024-02 | 2024-03 | 2 | 2024-02, 2024-03 | 1,214 | 1,154 | 848 | 29.00 | 44.50 |
| Wave 4 high-activity period | 2024-07 | 2024-08 | 2 | 2024-07, 2024-08 | 1,404 | 1,294 | 951 | 27.60 | 42.40 |

This table provides the operational definition, month-level coverage, and phase grouping used for the exclusion-based COVID sensitivity analyses.

**Supplementary Table S5. Main pathogen spectrum and key resistance results before and after excluding SARS-CoV-2 high-activity periods**

Differences are shown in percentage points.

Blank sample-size fields indicate pathogen-spectrum proportions based on the overall isolate denominator.

| **Analysis domain** | **Outcome** | **Metric** | **Full cohort** | **Excluding high-activity months** | **Difference (pp)** | **n (full)** | **n (excluded)** |
| --- | --- | --- | --- | --- | --- | --- | --- |
| Pathogen spectrum | *Escherichia coli* | Proportion of all isolates (%) | 12.97 | 13.08 | 0.11 |  |  |
| *Klebsiella pneumoniae* | 10.48 | 10.55 | 0.08 |  |  |
| *Acinetobacter baumannii* | 8.00 | 7.97 | -0.03 |  |  |
| *Pseudomonas aeruginosa* | 7.79 | 7.79 | -0.00 |  |  |
| *Candida albicans* | 7.73 | 7.55 | -0.19 |  |  |
| *Staphylococcus aureus* | 6.64 | 6.68 | 0.04 |  |  |
| *Staphylococcus epidermidis* | 4.38 | 4.35 | -0.02 |  |  |
| *Enterococcus faecium* | 3.88 | 3.93 | 0.04 |  |  |
| *Proteus mirabilis* | 3.32 | 3.30 | -0.02 |  |  |
| *Enterococcus faecalis* | 3.25 | 3.21 | -0.04 |  |  |
| Key resistance phenotypes | MRSA | Overall resistance rate (%) | 49.02 | 48.34 | -0.69 | 3025 | 2619 |
| CRAB | 79.42 | 79.59 | 0.17 | 3057 | 2538 |
| CRPA | 24.74 | 24.56 | -0.18 | 3359 | 2870 |
| CRKP | 22.93 | 23.12 | 0.20 | 4471 | 3836 |
| FQ-R E. coli | 56.38 | 56.07 | -0.30 | 5889 | 5113 |
| ICU-nonICU gaps | CRAB meropenem ICU-nonICU gap | ICU minus nonICU resistance difference (pp) | 28.83 | 28.39 | -0.44 | ICU 1861; nonICU 1196 | ICU 1572; nonICU 966 |
| CRPA imipenem ICU-nonICU gap | 15.06 | 14.50 | -0.55 | ICU 964; nonICU 2395 | ICU 822; nonICU 2048 |
| MRSA ICU-nonICU gap | 9.91 | 10.34 | 0.43 | ICU 604; nonICU 2421 | ICU 521; nonICU 2098 |
| CRKP imipenem ICU-nonICU gap | 17.51 | 18.21 | 0.70 | ICU 1457; nonICU 3014 | ICU 1245; nonICU 2591 |

This table summarizes the magnitude of change in the top pathogen spectrum and prespecified resistance phenotypes after excluding hospital-based SARS-CoV-2 high-activity periods.

**Supplementary Table S6. Full temporal trend statistics for all screened organism-antibiotic combinations**

The table includes all organism-antibiotic combinations in the predefined trend-testing set.

A combination was included if it met the annual minimum sample-size rule and contributed data from at least three years.

FDR, false discovery rate.

| **Organism** | **Antibiotic** | **Phenotype label** | **Analysis n** | **First year** | **Last year** | **Years contributing** | **2019 rate (%)** | **2025 rate (%)** | **Direction** | **Raw p** | **FDR p** | **Raw p <0.05** | **FDR significant** |
| --- | --- | --- | --- | --- | --- | --- | --- | --- | --- | --- | --- | --- | --- |
| *Escherichia coli* | Imipenem |  | 5,414 | 2,019 | 2,025 | 7 | 2.02 | 2.61 | increasing | 0.4229 | 0.6877 | No | No |
| *Escherichia coli* | Ertapenem |  | 2,073 | 2,019 | 2,025 | 5 | 4.07 | 2.01 | decreasing | 0.7808 | 0.9331 | No | No |
| *Escherichia coli* | Nitrofurantoin |  | 1,950 | 2,019 | 2,025 | 5 | 3.59 | 2.41 | decreasing | 0.6821 | 0.8857 | No | No |
| *Escherichia coli* | Piperacillin |  | 3,202 | 2,021 | 2,025 | 5 | 78.39 | 81.76 | increasing | 0.0313 | 0.1682 | Yes | No |
| *Escherichia coli* | Piperacillin-tazobactam |  | 5,760 | 2,019 | 2,025 | 7 | 7.39 | 13.65 | increasing | 0.0128 | 0.1031 | Yes | No |
| *Escherichia coli* | Tetracycline |  | 3,230 | 2,021 | 2,025 | 5 | 61.86 | 55.65 | decreasing | 0.3252 | 0.6041 | No | No |
| *Escherichia coli* | Trimethoprim-sulfamethoxazole |  | 5,893 | 2,019 | 2,025 | 7 | 54.19 | 49.40 | decreasing | 0.0619 | 0.2432 | No | No |
| *Escherichia coli* | Doripenem |  | 3,227 | 2,021 | 2,025 | 5 | 2.12 | 3.28 | increasing | 0.7953 | 0.9347 | No | No |
| *Escherichia coli* | Polymyxin B |  | 4,028 | 2,020 | 2,025 | 6 | 5.68 | 1.01 | decreasing | 0.1963 | 0.4389 | No | No |
| *Escherichia coli* | Ceftazidime |  | 5,889 | 2,019 | 2,025 | 7 | 29.41 | 27.94 | decreasing | 0.9999 | 1 | No | No |
| *Escherichia coli* | Cefepime |  | 5,008 | 2,019 | 2,025 | 7 | 25.41 | 40.42 | increasing | 0.0042 | 0.0569 | Yes | No |
| *Escherichia coli* | Cefuroxime |  | 3,580 | 2,021 | 2,025 | 5 | 58.05 | 54.59 | decreasing | 0.8697 | 0.9596 | No | No |
| *Escherichia coli* | Cefuroxime axetil |  | 3,580 | 2,021 | 2,025 | 5 | 58.47 | 54.59 | decreasing | 0.9792 | 1 | No | No |
| *Escherichia coli* | Cefoperazone-sulbactam |  | 4,085 | 2,019 | 2,025 | 7 | 26.32 | 4.62 | decreasing | 0.0211 | 0.131 | Yes | No |
| *Escherichia coli* | Cefazolin |  | 1,883 | 2,019 | 2,025 | 5 | 60.32 | 55.62 | decreasing | 0.4965 | 0.7736 | No | No |
| *Escherichia coli* | Cefazolin (other) |  | 913 | 2,019 | 2,025 | 5 | 100.00 | 96.26 | decreasing | 0.8525 | 0.9596 | No | No |
| *Escherichia coli* | Ceftizoxime |  | 3,156 | 2,021 | 2,025 | 5 | 22.46 | 19.48 | decreasing | 0.6144 | 0.8601 | No | No |
| *Escherichia coli* | Cephalothin |  | 3,233 | 2,021 | 2,025 | 5 | 67.80 | 62.36 | decreasing | 0.7824 | 0.9331 | No | No |
| *Escherichia coli* | Cefotaxime |  | 3,590 | 2,021 | 2,025 | 5 | 56.78 | 51.10 | decreasing | 0.8884 | 0.9665 | No | No |
| *Escherichia coli* | Ceftriaxone |  | 2,125 | 2,019 | 2,025 | 5 | 58.41 | 52.74 | decreasing | 0.1816 | 0.4236 | No | No |
| *Escherichia coli* | Cefotetan |  | 5,016 | 2,019 | 2,025 | 7 | 5.85 | 3.76 | decreasing | 0.2548 | 0.526 | No | No |
| *Escherichia coli* | Cefpodoxime |  | 3,234 | 2,021 | 2,025 | 5 | 58.05 | 53.85 | decreasing | 0.9167 | 0.9792 | No | No |
| *Escherichia coli* | Tobramycin |  | 5,893 | 2,019 | 2,025 | 7 | 14.24 | 29.29 | increasing | 0.016 | 0.117 | Yes | No |
| *Escherichia coli* | Levofloxacin | FQ-R E. coli | 5,889 | 2,019 | 2,025 | 7 | 58.44 | 55.38 | decreasing | 0.5815 | 0.8409 | No | No |
| *Escherichia coli* | Gentamicin |  | 2,126 | 2,019 | 2,025 | 5 | 35.24 | 29.68 | decreasing | 0.0824 | 0.2939 | No | No |
| *Escherichia coli* | Doxycycline |  | 4,112 | 2,019 | 2,025 | 7 | 48.00 | 37.35 | decreasing | 0.5545 | 0.8344 | No | No |
| *Escherichia coli* | Tigecycline |  | 4,084 | 2,019 | 2,025 | 7 | 0.00 | 0.20 | increasing | 0.0858 | 0.2939 | No | No |
| *Escherichia coli* | Ticarcillin |  | 3,233 | 2,021 | 2,025 | 5 | 80.93 | 79.38 | decreasing | 0.6805 | 0.8857 | No | No |
| *Escherichia coli* | Ticarcillin-clavulanate |  | 3,758 | 2,019 | 2,025 | 7 | 38.46 | 13.23 | decreasing | 0.104 | 0.3124 | No | No |
| *Escherichia coli* | Aztreonam |  | 5,887 | 2,019 | 2,025 | 7 | 43.53 | 31.83 | decreasing | 0.0201 | 0.131 | Yes | No |
| *Escherichia coli* | Ampicillin |  | 2,128 | 2,019 | 2,025 | 5 | 88.27 | 81.03 | decreasing | 0.189 | 0.4285 | No | No |
| *Escherichia coli* | Ampicillin-sulbactam |  | 2,127 | 2,019 | 2,025 | 5 | 59.21 | 36.78 | decreasing | 0.0006 | 0.0345 | Yes | Yes |
| *Escherichia coli* | Ciprofloxacin |  | 5,894 | 2,019 | 2,025 | 7 | 66.76 | 60.70 | decreasing | 0.1347 | 0.3615 | No | No |
| *Escherichia coli* | Minocycline |  | 4,116 | 2,019 | 2,025 | 7 | 28.00 | 14.14 | decreasing | 0.1796 | 0.4236 | No | No |
| *Escherichia coli* | Meropenem |  | 4,113 | 2,019 | 2,025 | 7 | 7.69 | 3.02 | decreasing | 0.0427 | 0.1949 | Yes | No |
| *Escherichia coli* | Moxifloxacin |  | 3,226 | 2,021 | 2,025 | 5 | 54.24 | 52.79 | decreasing | 0.7896 | 0.9347 | No | No |
| *Escherichia coli* | Nalidixic acid |  | 3,233 | 2,021 | 2,025 | 5 | 86.86 | 85.92 | decreasing | 0.6389 | 0.8736 | No | No |
| *Escherichia coli* | Amikacin |  | 5,886 | 2,019 | 2,025 | 7 | 2.79 | 3.56 | increasing | 0.0463 | 0.2014 | Yes | No |
| *Escherichia coli* | Amoxicillin-clavulanate |  | 3,587 | 2,021 | 2,025 | 5 | 15.68 | 15.12 | decreasing | 0.4685 | 0.7542 | No | No |
| *Enterococcus faecium* | Vancomycin |  | 1,764 | 2,019 | 2,025 | 7 | 4.61 | 6.33 | increasing | 0.0978 | 0.3029 | No | No |
| *Enterococcus faecium* | Linezolid |  | 1,752 | 2,019 | 2,025 | 7 | 1.33 | 0.00 | decreasing | 0.5542 | 0.8344 | No | No |
| *Enterococcus faecium* | Nitrofurantoin |  | 924 | 2,019 | 2,023 | 5 | 52.63 | 51.58 | decreasing | 0.3785 | 0.6552 | No | No |
| *Enterococcus faecium* | Quinupristin-dalfopristin |  | 939 | 2,019 | 2,023 | 5 | 3.95 | 6.25 | increasing | 0.2543 | 0.526 | No | No |
| *Enterococcus faecium* | Tetracycline |  | 943 | 2,019 | 2,023 | 5 | 26.97 | 34.69 | increasing | 0.0841 | 0.2939 | No | No |
| *Enterococcus faecium* | Levofloxacin |  | 1,768 | 2,019 | 2,025 | 7 | 92.76 | 93.37 | increasing | 0.2739 | 0.5444 | No | No |
| *Enterococcus faecium* | High-level gentamicin |  | 1,752 | 2,019 | 2,025 | 7 | 47.02 | 66.47 | increasing | 0.0913 | 0.294 | No | No |
| *Enterococcus faecium* | Tigecycline |  | 1,315 | 2,019 | 2,025 | 7 | 0.00 | 0.00 | stable | 0.3264 | 0.6041 | No | No |
| *Enterococcus faecium* | Teicoplanin |  | 797 | 2,023 | 2,025 | 3 | 20.62 | 22.60 | increasing | 0.2873 | 0.5641 | No | No |
| *Enterococcus faecium* | Ampicillin |  | 1,770 | 2,019 | 2,025 | 7 | 94.08 | 93.39 | decreasing | 0.2737 | 0.5444 | No | No |
| *Enterococcus faecium* | Ciprofloxacin |  | 942 | 2,019 | 2,023 | 5 | 93.42 | 94.90 | increasing | 0.6105 | 0.8601 | No | No |
| *Enterococcus faecium* | Erythromycin |  | 1,756 | 2,019 | 2,025 | 7 | 92.11 | 83.73 | decreasing | 0.0053 | 0.0662 | Yes | No |
| *Enterococcus faecium* | Penicillin G |  | 1,754 | 2,019 | 2,025 | 7 | 96.05 | 94.56 | decreasing | 0.1156 | 0.321 | No | No |
| *Enterococcus faecium* | High-level streptomycin |  | 929 | 2,019 | 2,023 | 5 | 30.46 | 36.08 | increasing | 0.8647 | 0.9596 | No | No |
| *Enterococcus faecalis* | Vancomycin |  | 1,468 | 2,019 | 2,025 | 7 | 0.00 | 0.38 | increasing | 0.7072 | 0.8905 | No | No |
| *Enterococcus faecalis* | Linezolid |  | 1,412 | 2,019 | 2,025 | 7 | 3.70 | 0.00 | decreasing | 0.1048 | 0.3124 | No | No |
| *Enterococcus faecalis* | Nitrofurantoin |  | 761 | 2,019 | 2,023 | 5 | 3.57 | 2.99 | decreasing | 0.7717 | 0.9331 | No | No |
| *Enterococcus faecalis* | Quinupristin-dalfopristin |  | 400 | 2,019 | 2,021 | 3 | 100.00 | 100.00 | stable | 1 | 1 | No | No |
| *Enterococcus faecalis* | Tetracycline |  | 775 | 2,019 | 2,023 | 5 | 79.07 | 88.24 | increasing | 0.7226 | 0.8905 | No | No |
| *Enterococcus faecalis* | Levofloxacin |  | 1,475 | 2,019 | 2,025 | 7 | 34.48 | 47.89 | increasing | 0.0347 | 0.1745 | Yes | No |
| *Enterococcus faecalis* | High-level gentamicin |  | 1,461 | 2,019 | 2,025 | 7 | 39.53 | 45.14 | increasing | 0.041 | 0.1943 | Yes | No |
| *Enterococcus faecalis* | Tigecycline |  | 1,426 | 2,019 | 2,025 | 7 | 0.00 | 0.00 | stable | 1 | 1 | No | No |
| *Enterococcus faecalis* | Teicoplanin |  | 676 | 2,023 | 2,025 | 3 | 8.72 | 9.96 | increasing | 0.0928 | 0.294 | No | No |
| *Enterococcus faecalis* | Ampicillin |  | 1,477 | 2,019 | 2,025 | 7 | 5.75 | 7.28 | increasing | 0.6566 | 0.8736 | No | No |
| *Enterococcus faecalis* | Ciprofloxacin |  | 772 | 2,019 | 2,023 | 5 | 35.63 | 37.88 | increasing | 0.9692 | 1 | No | No |
| *Enterococcus faecalis* | Erythromycin |  | 1,458 | 2,019 | 2,025 | 7 | 57.47 | 68.58 | increasing | 0.0107 | 0.0939 | Yes | No |
| *Enterococcus faecalis* | Penicillin G |  | 1,470 | 2,019 | 2,025 | 7 | 9.30 | 11.58 | increasing | 0.7005 | 0.8905 | No | No |
| *Enterococcus faecalis* | Daptomycin |  | 439 | 2,023 | 2,025 | 3 | 2.65 | 0.00 | decreasing | 0.3348 | 0.6056 | No | No |
| *Enterococcus faecalis* | High-level streptomycin |  | 765 | 2,019 | 2,023 | 5 | 24.42 | 44.62 | increasing | 0.3012 | 0.5774 | No | No |
| *Klebsiella pneumoniae* | Imipenem | CRKP | 4,471 | 2,019 | 2,025 | 7 | 28.00 | 18.25 | decreasing | 0.003 | 0.0481 | Yes | Yes |
| *Klebsiella pneumoniae* | Ertapenem |  | 1,172 | 2,019 | 2,025 | 4 | 14.33 | 15.58 | increasing | 0.6445 | 0.8736 | No | No |
| *Klebsiella pneumoniae* | Nitrofurantoin |  | 1,098 | 2,019 | 2,025 | 4 | 41.51 | 54.25 | increasing | 0.1213 | 0.3309 | No | No |
| *Klebsiella pneumoniae* | Piperacillin |  | 2,631 | 2,021 | 2,025 | 5 | 94.47 | 59.65 | decreasing | 0.003 | 0.0481 | Yes | Yes |
| *Klebsiella pneumoniae* | Piperacillin-tazobactam |  | 4,605 | 2,019 | 2,025 | 7 | 29.19 | 29.18 | decreasing | 0.8119 | 0.9404 | No | No |
| *Klebsiella pneumoniae* | Tetracycline |  | 2,983 | 2,021 | 2,025 | 5 | 31.16 | 34.33 | increasing | 0.4781 | 0.7622 | No | No |
| *Klebsiella pneumoniae* | Trimethoprim-sulfamethoxazole |  | 4,767 | 2,019 | 2,025 | 7 | 41.29 | 24.60 | decreasing | 0.033 | 0.1715 | Yes | No |
| *Klebsiella pneumoniae* | Doripenem |  | 2,985 | 2,021 | 2,025 | 5 | 16.00 | 18.94 | increasing | 0.3952 | 0.656 | No | No |
| *Klebsiella pneumoniae* | Polymyxin B |  | 3,702 | 2,020 | 2,025 | 6 | 4.72 | 2.93 | decreasing | 0.543 | 0.8326 | No | No |
| *Klebsiella pneumoniae* | Ceftazidime |  | 4,766 | 2,019 | 2,025 | 7 | 34.84 | 30.40 | decreasing | 0.0484 | 0.2046 | Yes | No |
| *Klebsiella pneumoniae* | Cefepime |  | 4,408 | 2,019 | 2,025 | 7 | 31.97 | 31.28 | decreasing | 0.1612 | 0.3992 | No | No |
| *Klebsiella pneumoniae* | Cefuroxime |  | 3,368 | 2,021 | 2,025 | 5 | 34.00 | 38.66 | increasing | 0.6119 | 0.8601 | No | No |
| *Klebsiella pneumoniae* | Cefuroxime axetil |  | 3,367 | 2,021 | 2,025 | 5 | 34.67 | 38.66 | increasing | 0.4997 | 0.7736 | No | No |
| *Klebsiella pneumoniae* | Cefoperazone-sulbactam |  | 3,797 | 2,019 | 2,025 | 7 | 62.86 | 20.78 | decreasing | 0.0312 | 0.1682 | Yes | No |
| *Klebsiella pneumoniae* | Cefazolin |  | 1,093 | 2,019 | 2,025 | 4 | 45.65 | 35.00 | decreasing | 0.0396 | 0.1933 | Yes | No |
| *Klebsiella pneumoniae* | Cefazolin (other) |  | 557 | 2,019 | 2,025 | 4 | 100.00 | 88.61 | decreasing | 0.8476 | 0.9596 | No | No |
| *Klebsiella pneumoniae* | Ceftizoxime |  | 2,957 | 2,021 | 2,025 | 5 | 19.00 | 24.58 | increasing | 0.5783 | 0.8409 | No | No |
| *Klebsiella pneumoniae* | Cephalothin |  | 2,986 | 2,021 | 2,025 | 5 | 34.50 | 43.05 | increasing | 0.7752 | 0.9331 | No | No |
| *Klebsiella pneumoniae* | Cefotaxime |  | 3,370 | 2,021 | 2,025 | 5 | 29.00 | 36.13 | increasing | 0.9158 | 0.9792 | No | No |
| *Klebsiella pneumoniae* | Ceftriaxone |  | 1,303 | 2,019 | 2,025 | 4 | 42.11 | 32.21 | decreasing | 0.0797 | 0.2939 | No | No |
| *Klebsiella pneumoniae* | Cefotetan |  | 3,907 | 2,019 | 2,025 | 7 | 19.50 | 18.21 | decreasing | 0.1765 | 0.4236 | No | No |
| *Klebsiella pneumoniae* | Cefpodoxime |  | 2,986 | 2,021 | 2,025 | 5 | 34.00 | 41.46 | increasing | 0.8083 | 0.9404 | No | No |
| *Klebsiella pneumoniae* | Tobramycin |  | 4,771 | 2,019 | 2,025 | 7 | 27.68 | 23.20 | decreasing | 0.1094 | 0.3203 | No | No |
| *Klebsiella pneumoniae* | Levofloxacin |  | 4,768 | 2,019 | 2,025 | 7 | 38.90 | 29.00 | decreasing | 0.0036 | 0.053 | Yes | No |
| *Klebsiella pneumoniae* | Gentamicin |  | 1,304 | 2,019 | 2,025 | 4 | 31.27 | 19.74 | decreasing | 0.0156 | 0.117 | Yes | No |
| *Klebsiella pneumoniae* | Doxycycline |  | 3,854 | 2,019 | 2,025 | 7 | 61.00 | 32.13 | decreasing | 0.0103 | 0.0939 | Yes | No |
| *Klebsiella pneumoniae* | Tigecycline |  | 3,653 | 2,019 | 2,025 | 7 | 8.16 | 1.84 | decreasing | 0.3832 | 0.656 | No | No |
| *Klebsiella pneumoniae* | Ticarcillin-clavulanate |  | 3,474 | 2,019 | 2,025 | 7 | 59.00 | 27.15 | decreasing | 0.027 | 0.1555 | Yes | No |
| *Klebsiella pneumoniae* | Aztreonam |  | 4,772 | 2,019 | 2,025 | 7 | 40.33 | 31.27 | decreasing | 0.0026 | 0.0481 | Yes | Yes |
| *Klebsiella pneumoniae* | Ampicillin |  | 909 | 2,019 | 2,021 | 3 | 99.38 | 99.62 | increasing | 0.7245 | 0.8905 | No | No |
| *Klebsiella pneumoniae* | Ampicillin-sulbactam |  | 1,304 | 2,019 | 2,025 | 4 | 45.20 | 35.23 | decreasing | 0.1384 | 0.3652 | No | No |
| *Klebsiella pneumoniae* | Ciprofloxacin |  | 4,770 | 2,019 | 2,025 | 7 | 49.88 | 34.20 | decreasing | 0.0006 | 0.0345 | Yes | Yes |
| *Klebsiella pneumoniae* | Minocycline |  | 3,858 | 2,019 | 2,025 | 7 | 47.00 | 24.50 | decreasing | 0.008 | 0.0867 | Yes | No |
| *Klebsiella pneumoniae* | Meropenem |  | 3,853 | 2,019 | 2,025 | 7 | 55.00 | 17.84 | decreasing | 0.0206 | 0.131 | Yes | No |
| *Klebsiella pneumoniae* | Moxifloxacin |  | 2,985 | 2,021 | 2,025 | 5 | 27.00 | 28.64 | increasing | 0.3555 | 0.6359 | No | No |
| *Klebsiella pneumoniae* | Nalidixic acid |  | 2,985 | 2,021 | 2,025 | 5 | 36.00 | 39.14 | increasing | 0.6765 | 0.8857 | No | No |
| *Klebsiella pneumoniae* | Amikacin |  | 4,740 | 2,019 | 2,025 | 7 | 20.29 | 9.84 | decreasing | 0.0189 | 0.131 | Yes | No |
| *Klebsiella pneumoniae* | Amoxicillin-clavulanate |  | 3,372 | 2,021 | 2,025 | 5 | 20.50 | 27.20 | increasing | 0.5707 | 0.8409 | No | No |
| *Staphylococcus aureus* | Vancomycin |  | 3,009 | 2,019 | 2,025 | 7 | 0.00 | 0.00 | stable | 0.6349 | 0.8736 | No | No |
| *Staphylococcus aureus* | Linezolid |  | 3,011 | 2,019 | 2,025 | 7 | 0.38 | 0.00 | decreasing | 0.2049 | 0.4399 | No | No |
| *Staphylococcus aureus* | Rifampicin |  | 3,027 | 2,019 | 2,025 | 7 | 3.77 | 1.05 | decreasing | 0.0772 | 0.2939 | No | No |
| *Staphylococcus aureus* | Nitrofurantoin |  | 1,554 | 2,019 | 2,023 | 5 | 1.15 | 0.84 | decreasing | 0.1505 | 0.3787 | No | No |
| *Staphylococcus aureus* | Quinupristin-dalfopristin |  | 1,607 | 2,019 | 2,023 | 5 | 1.89 | 3.12 | increasing | 0.7197 | 0.8905 | No | No |
| *Staphylococcus aureus* | Tetracycline |  | 1,609 | 2,019 | 2,023 | 5 | 26.04 | 29.46 | increasing | 0.5764 | 0.8409 | No | No |
| *Staphylococcus aureus* | Trimethoprim-sulfamethoxazole |  | 3,024 | 2,019 | 2,025 | 7 | 7.92 | 6.19 | decreasing | 0.203 | 0.4399 | No | No |
| *Staphylococcus aureus* | Ceftaroline |  | 1,246 | 2,023 | 2,025 | 3 | 0.00 | 0.00 | stable | 1 | 1 | No | No |
| *Staphylococcus aureus* | Levofloxacin |  | 3,023 | 2,019 | 2,025 | 7 | 24.15 | 28.98 | increasing | 0.0081 | 0.0867 | Yes | No |
| *Staphylococcus aureus* | Gentamicin |  | 3,022 | 2,019 | 2,025 | 7 | 7.17 | 11.46 | increasing | 0.1137 | 0.321 | No | No |
| *Staphylococcus aureus* | Tigecycline |  | 2,942 | 2,019 | 2,025 | 7 | 0.00 | 0.00 | stable | 1 | 1 | No | No |
| *Staphylococcus aureus* | Teicoplanin |  | 1,386 | 2,023 | 2,025 | 3 | 4.19 | 3.87 | decreasing | 0.9954 | 1 | No | No |
| *Staphylococcus aureus* | Clindamycin |  | 3,021 | 2,019 | 2,025 | 7 | 43.94 | 50.70 | increasing | 0.0094 | 0.0939 | Yes | No |
| *Staphylococcus aureus* | Ciprofloxacin |  | 1,606 | 2,019 | 2,023 | 5 | 24.53 | 28.12 | increasing | 0.0931 | 0.294 | No | No |
| *Staphylococcus aureus* | Erythromycin |  | 3,024 | 2,019 | 2,025 | 7 | 46.79 | 51.94 | increasing | 0.0264 | 0.1555 | Yes | No |
| *Staphylococcus aureus* | Penicillin G |  | 3,016 | 2,019 | 2,025 | 7 | 89.39 | 91.34 | increasing | 0.403 | 0.662 | No | No |
| *Staphylococcus aureus* | Oxacillin | MRSA | 3,025 | 2,019 | 2,025 | 7 | 45.83 | 52.37 | increasing | 0.3171 | 0.6006 | No | No |
| *Staphylococcus aureus* | Moxifloxacin |  | 3,028 | 2,019 | 2,025 | 7 | 20.75 | 26.76 | increasing | 0.0111 | 0.0939 | Yes | No |
| *Staphylococcus aureus* | Daptomycin |  | 1,261 | 2,023 | 2,025 | 3 | 0.32 | 0.00 | decreasing | 0.3727 | 0.6552 | No | No |
| *Pseudomonas aeruginosa* | Imipenem | CRPA | 3,359 | 2,019 | 2,025 | 7 | 21.74 | 24.83 | increasing | 0.1868 | 0.4285 | No | No |
| *Pseudomonas aeruginosa* | Piperacillin |  | 41 | 2,021 | 2,023 | 3 | 13.33 | 30.00 | increasing | 0.1414 | 0.3673 | No | No |
| *Pseudomonas aeruginosa* | Piperacillin-tazobactam |  | 3,352 | 2,019 | 2,025 | 7 | 12.94 | 26.58 | increasing | 0.0011 | 0.0369 | Yes | Yes |
| *Pseudomonas aeruginosa* | Polymyxin B |  | 2,712 | 2,019 | 2,025 | 7 | 7.14 | 1.97 | decreasing | 0.113 | 0.321 | No | No |
| *Pseudomonas aeruginosa* | Ceftazidime |  | 3,522 | 2,019 | 2,025 | 7 | 18.08 | 16.00 | decreasing | 0.7245 | 0.8905 | No | No |
| *Pseudomonas aeruginosa* | Cefepime |  | 3,308 | 2,019 | 2,025 | 7 | 11.24 | 5.99 | decreasing | 0.301 | 0.5774 | No | No |
| *Pseudomonas aeruginosa* | Cefoperazone-sulbactam |  | 2,756 | 2,019 | 2,025 | 7 | 24.14 | 15.15 | decreasing | 0.8739 | 0.9596 | No | No |
| *Pseudomonas aeruginosa* | Cefazolin |  | 678 | 2,019 | 2,022 | 4 | 100.00 | 100.00 | stable | 0.204 | 0.4399 | No | No |
| *Pseudomonas aeruginosa* | Tobramycin |  | 3,497 | 2,019 | 2,025 | 7 | 6.90 | 7.96 | increasing | 0.0898 | 0.294 | No | No |
| *Pseudomonas aeruginosa* | Levofloxacin |  | 3,517 | 2,019 | 2,025 | 7 | 19.16 | 25.55 | increasing | 0.0602 | 0.2423 | No | No |
| *Pseudomonas aeruginosa* | Gentamicin |  | 715 | 2,019 | 2,022 | 4 | 7.88 | 6.06 | decreasing | 0.1679 | 0.4095 | No | No |
| *Pseudomonas aeruginosa* | Tigecycline |  | 262 | 2,019 | 2,021 | 3 | 88.33 | 100.00 | increasing | 0.3919 | 0.656 | No | No |
| *Pseudomonas aeruginosa* | Ticarcillin-clavulanate |  | 2,762 | 2,019 | 2,025 | 7 | 31.75 | 31.06 | decreasing | 0.8562 | 0.9596 | No | No |
| *Pseudomonas aeruginosa* | Ciprofloxacin |  | 3,534 | 2,019 | 2,025 | 7 | 19.16 | 23.35 | increasing | 0.0831 | 0.2939 | No | No |
| *Pseudomonas aeruginosa* | Meropenem |  | 2,835 | 2,019 | 2,025 | 7 | 19.05 | 19.86 | increasing | 0.8569 | 0.9596 | No | No |
| *Pseudomonas aeruginosa* | Amikacin |  | 2,243 | 2,019 | 2,024 | 6 | 6.13 | 7.14 | increasing | 0.6513 | 0.8736 | No | No |
| *Acinetobacter baumannii* | Imipenem |  | 3,397 | 2,019 | 2,025 | 7 | 74.39 | 75.90 | increasing | 0.2367 | 0.5014 | No | No |
| *Acinetobacter baumannii* | Piperacillin-tazobactam |  | 3,642 | 2,019 | 2,025 | 7 | 74.62 | 77.02 | increasing | 0.585 | 0.8409 | No | No |
| *Acinetobacter baumannii* | Trimethoprim-sulfamethoxazole |  | 3,640 | 2,019 | 2,025 | 7 | 51.21 | 55.20 | increasing | 0.6937 | 0.8905 | No | No |
| *Acinetobacter baumannii* | Polymyxin B |  | 2,958 | 2,019 | 2,025 | 7 | 0.00 | 1.01 | increasing | 0.3344 | 0.6056 | No | No |
| *Acinetobacter baumannii* | Ceftazidime |  | 3,646 | 2,019 | 2,025 | 7 | 75.45 | 75.65 | increasing | 0.4964 | 0.7736 | No | No |
| *Acinetobacter baumannii* | Cefepime |  | 3,396 | 2,019 | 2,025 | 7 | 67.07 | 63.20 | decreasing | 0.0436 | 0.1949 | Yes | No |
| *Acinetobacter baumannii* | Cefoperazone-sulbactam |  | 2,973 | 2,019 | 2,025 | 7 | 66.67 | 54.03 | decreasing | 0.2673 | 0.5444 | No | No |
| *Acinetobacter baumannii* | Cefazolin |  | 602 | 2,019 | 2,022 | 4 | 100.00 | 100.00 | stable | 1 | 1 | No | No |
| *Acinetobacter baumannii* | Ceftriaxone |  | 605 | 2,019 | 2,022 | 4 | 71.03 | 64.71 | decreasing | 0.9184 | 0.9792 | No | No |
| *Acinetobacter baumannii* | Tobramycin |  | 3,647 | 2,019 | 2,025 | 7 | 60.61 | 63.20 | increasing | 0.8762 | 0.9596 | No | No |
| *Acinetobacter baumannii* | Levofloxacin |  | 3,642 | 2,019 | 2,025 | 7 | 45.76 | 63.78 | increasing | 0.0011 | 0.0369 | Yes | Yes |
| *Acinetobacter baumannii* | Gentamicin |  | 604 | 2,019 | 2,022 | 4 | 61.68 | 56.25 | decreasing | 0.3893 | 0.656 | No | No |
| *Acinetobacter baumannii* | Doxycycline |  | 3,052 | 2,019 | 2,025 | 7 | 72.00 | 55.12 | decreasing | 0.0005 | 0.0345 | Yes | Yes |
| *Acinetobacter baumannii* | Tigecycline |  | 3,017 | 2,019 | 2,025 | 7 | 0.00 | 0.43 | increasing | 0.1453 | 0.3714 | No | No |
| *Acinetobacter baumannii* | Ticarcillin-clavulanate |  | 3,057 | 2,019 | 2,025 | 7 | 87.30 | 75.32 | decreasing | 0.002 | 0.0481 | Yes | Yes |
| *Acinetobacter baumannii* | Ampicillin-sulbactam |  | 604 | 2,019 | 2,022 | 4 | 70.56 | 56.25 | decreasing | 0.9329 | 0.9881 | No | No |
| *Acinetobacter baumannii* | Ciprofloxacin |  | 3,642 | 2,019 | 2,025 | 7 | 76.06 | 75.76 | decreasing | 0.3777 | 0.6552 | No | No |
| *Acinetobacter baumannii* | Minocycline |  | 3,055 | 2,019 | 2,025 | 7 | 21.60 | 11.83 | decreasing | 0.0496 | 0.2046 | Yes | No |
| *Acinetobacter baumannii* | Meropenem | CRAB | 3,057 | 2,019 | 2,025 | 7 | 88.10 | 76.33 | decreasing | 0.0024 | 0.0481 | Yes | Yes |
| *Acinetobacter baumannii* | Amikacin |  | 2,683 | 2,021 | 2,025 | 5 | 35.71 | 60.23 | increasing | 0.6549 | 0.8736 | No | No |

This table contains the full temporal trend screen for all organism-antibiotic combinations entering the prespecified trend-testing set (n=161), including 2019 and 2025 rates, trend direction, raw *p* values, FDR-adjusted *p* values, and significance flags.

Supplementary Figures

Figure S1. Specimen-stratified heatmap of key resistance phenotypes.

Resistance rates for selected organism–antibiotic combinations are shown across major specimen groups, including respiratory, urine, blood, wound/pus, and sterile body fluid specimens. Values represent percentage resistance based on the first-isolate AST panel dataset. This figure provides supplementary evidence of heterogeneity across specimen-defined clinical contexts.

Figure S2. Monthly SARS-CoV-2 activity and definition of high-activity periods.

Monthly SARS-CoV-2 positivity rates and positive test counts are shown. High-activity months were defined using prespecified thresholds (positivity rate ≥20% and/or ≥500 positive tests) and grouped into phases if separated by no more than two months. These phases were used for exclusion-based sensitivity analyses in the main manuscript.
